# Supplementary material
Source: publisher figshare collection journal article supplement (https://aacr.figshare.com/articles/dataset/_/22376217)

**TUNEL**

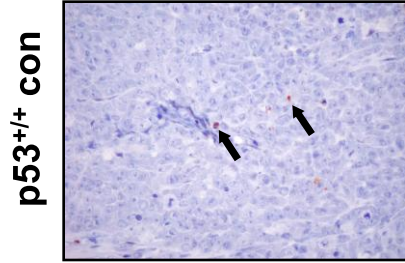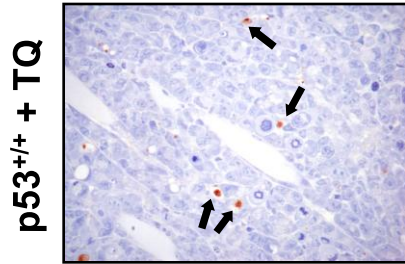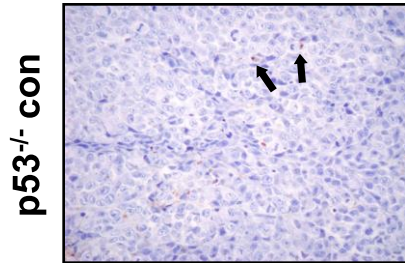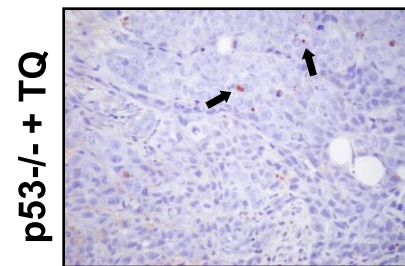

**Figure 1S**

Supplement: Supplementary file 1 [file 39821523]
